## CLINICAL ARTICLES

## Should Prophylaxis for *Pneumocystis carinii* Pneumonia in Solid Organ Transplant Recipients Ever Be Discontinued?

Steven M. Gordon, Steven P. LaRosa,\* Sujith Kalmadi,  
Alejandro C. Arroliga, Robin K. Avery,  
Laura Truesdell-LaRosa, and David L. Longworth

From the Departments of Infectious Diseases and Pulmonary Medicine,  
The Cleveland Clinic Foundation, Cleveland, Ohio

Solid organ transplant recipients are at risk for *Pneumocystis carinii* pneumonia (PCP), but the risk of PCP beyond 1 year is poorly defined. We identified 25 cases of PCP in 1,299 patients undergoing solid organ transplantation between 1987 and 1996 at The Cleveland Clinic Foundation (4.8 cases per 1,000 person transplant-years [PTY]). Ten (36%) of 28 PCP cases (transplantation was performed before 1987 in three cases) occurred  $\geq 1$  year after transplantation, and no patient developed PCP while receiving prophylaxis for PCP. The incidence of PCP during the first year following transplantation was eight times higher than that during subsequent years. The highest rate occurred among lung transplant recipients (22 cases per 1,000 PTY), for whom the incidence did not decline beyond the first year of transplantation. We conclude that the incidence of PCP is highest during the first year after transplantation and differs by type of solid organ transplant. Extending the duration of PCP prophylaxis beyond 1 year may be warranted for lung transplant recipients.

Solid organ transplant recipients are at increased risk for opportunistic infections including *Pneumocystis carinii* pneumonia (PCP) [1, 2]. Seventeen percent of 583 cases of PCP in five large series of patients without AIDS occurred in solid organ and bone marrow transplant recipients [3–7]. Trimethoprim-sulfamethoxazole (TMP-SMZ) is highly effective in preventing PCP and is the agent of choice for chemoprophylaxis [8, 9]. Primary prophylaxis is often discontinued within 12 months after transplantation because the risk of PCP is greatest

---

See editorial response by Arend and van't Wout  
on pages 247–9.

---

in the first 6 months after transplantation [1, 10]. The occurrence of cases of PCP beyond 1 year after transplantation at our institution prompted a retrospective review of cases of PCP in solid organ transplant recipients to further define the appropriate duration of primary chemoprophylaxis.

---

Received 9 March 1998; revised 31 August 1998.

This work was presented in part at the 34th annual meeting of the Infectious Diseases Society of America held on 19–20 September 1996 in New Orleans.

\* Present affiliation: Eli Lilly and Co., Indianapolis, Indiana.

Reprints or correspondence: Dr. Steven M. Gordon, The Cleveland Clinic Foundation, 9500 Euclid Avenue, Cleveland, Ohio 44195 (gordons@cesmtp.ccf.org).

**Clinical Infectious Diseases** 1999;28:240–6

© 1999 by the Infectious Diseases Society of America. All rights reserved.  
1058-4838/99/2802-0017\$03.00

### Materials and Methods

#### Patients

The Cleveland Clinic Foundation is a 934-bed tertiary care medical center and serves as one of the largest transplantation centers in the United States. A total of 1,299 patients underwent solid organ transplantations at The Cleveland Clinic Foundation between January 1987 and March 1996, including 534 renal transplantations (including 16 kidney-pancreas transplantations), 399 heart transplantations (including 5 heart-lung transplantations), 265 liver transplantations, and 101 lung transplantations.

#### Case Definition

We included all cases of PCP occurring in any solid organ transplant patient at The Cleveland Clinic Foundation between January 1987 and March 1996. A diagnosis of PCP was established by identification of compatible cysts in sputum, bronchoalveolar lavage (BAL) fluid, a transbronchial or open-lung biopsy specimen, or an autopsy specimen by using Grocott-Gomori methenamine-silver nitrate, toluidine blue, or modified Wright-Giemsa staining methods.

#### Case Ascertainment

Patients with PCP were identified retrospectively through a search of computerized discharge medical records, selecting the diagnostic related group code of “pneumocystosis,” and through the pathology and microbiology registration systems.

Clinical data abstracted from patient records included general demographic information, underlying immunosuppressing conditions, immunosuppressive drug regimens, methods of diagnosis, and the presence of additional pulmonary pathogens including bacteria, fungi, acid-fast organisms, or viruses.

Information was obtained regarding several aspects of the corticosteroid regimen utilized for immunosuppression. The dose of prednisone at time of diagnosis of PCP was noted. Previous dose-time relationships were classified by the methods used by Arend et al. [5]: continuous low dosage (<30 mg/d for  $\geq 1$  month), continuous high dosage ( $\geq 30$  mg/d for  $\geq 1$  month), and intermittent high dosage for rejection ( $\geq 500$  mg/d for  $\geq 2$  days). Cumulative dose and total duration of prednisone therapy were also recorded. Data were collected regarding the clinical characteristics seen at presentation, the use of primary PCP prophylaxis, antipneumocystis treatment instituted, direct cost of an episode of PCP, and attributable mortality. Cost data were obtained from computerized medical records for cases of PCP occurring after 1993 (1995 dollars).

#### Primary PCP Prophylaxis for Solid Organ Transplant Recipients

Protocols for primary PCP prophylaxis for solid organ transplant recipients in the various transplant groups were not uniform during the study period: heart transplant recipients, one double-strength tablet of TMP-SMZ was given every other day for 6 months; lung transplant recipients, one double-strength tablet of TMP-SMZ was given daily for 1 year; and renal transplant recipients, one-half double-strength tablet of TMP-SMZ was given daily for 1 year. Notably, liver transplant recipients did not routinely receive primary PCP prophylaxis until 1992, following the occurrence of nine cases of PCP in 1990 and 1991 (figure 1). The current protocols for first-line PCP prophylaxis with TMP-SMZ at our institution are as follows: heart-lung and lung transplant recipients, one double-strength tablet thrice weekly indefinitely; liver transplant recipients, one double-strength tablet thrice weekly for 1 year; renal transplant recipients, one-half double-strength tablet daily for the life of the allograft; and heart transplant recipients, one double-strength tablet every other day for 1 year.

#### Calculation of Rates of PCP

The crude attack rates of PCP for each group of transplant patients were determined by calculating the number of cases occurring in the study period divided by the total number of patients undergoing solid organ transplantation during the study period. Three kidney transplant recipients who underwent transplantation before 1987 and for whom PCP was diagnosed during the study period were included in the study but excluded from calculation of the incidence and attack rates of PCP. The intervals from transplantation to PCP for these three patients were 182, 575, and 832 weeks, respectively. For this reason,

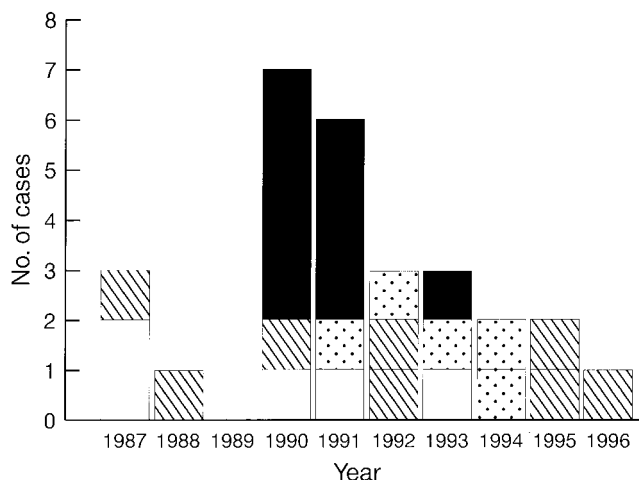

**Figure 1.** Distribution of 28 cases of *Pneumocystis carinii* pneumonia in solid organ transplant recipients of The Cleveland Clinic Foundation during 1987–1996. White bar = renal transplant recipients; solid bar = liver transplant recipients; striped bar = heart transplant recipients; and dotted bars = lung transplant recipients.

the total number of cases was 28, of which 25 were used to calculate incidence and attack rates. The incidence rates of PCP were measured in units of the reciprocal of person transplant-years (PTY) calculated through March 1996. Incidence rates were subsequently stratified for the first year of transplantation and the remainder of the follow-up period.

#### Risk Factors for Survival

Survivors of PCP were those patients who recovered from the acute respiratory illness; nonsurvivors were those patients who died of acute respiratory failure. Nonsurvivors were compared with survivors to assess for any potential risk factors for mortality, including serum lactate dehydrogenase (LDH) levels measured within 3 days of the diagnosis of PCP, respiratory rate, serum albumin level, and resting arterial-alveolar oxygen gradient (AaPO<sub>2</sub>) at presentation. The normal range for LDH levels at our laboratory is 100–220 U/L.

#### Statistical Methods

All data were entered into a computerized database for analysis (EPI-Info, Version 6.02 [11]). Student's *t* test and Fisher's two-tailed exact test were used for univariate analyses of the significance of associations. Multivariate logistic regression and Cox regression for association with mortality were done by using PC SAS/STAT (SAS Institute, Cary, NC). Differences were considered statistically significant at a *P* value of  $\leq .05$ .

#### Results

Twenty-eight cases of PCP were identified in solid organ transplant recipients, accounting for 30% of 92 cases of histo-

**Table 1.** Comparative incidence rates of PCP among 1,299 solid organ transplant recipients at The Cleveland Clinic Foundation during 1987–1996.

| Type of transplant | No. of transplants | All cases of PCP | No. of cases of PCP $\geq$ 1 y after transplantation | Attack rate (%) | Overall incidence rate* | Incidence rate during first year | Incidence rate* after first year |
|--------------------|--------------------|------------------|------------------------------------------------------|-----------------|-------------------------|----------------------------------|----------------------------------|
| All categories     | 1,299              | 25               | 8                                                    | 1.9             | 4.8                     | 14.5                             | 1.9                              |
| Lung               | 101                | 5                | 3                                                    | 5               | 22                      | 26                               | 19.6                             |
| Heart              | 399 <sup>†</sup>   | 8                | 3                                                    | 2               | 5                       | 14                               | 2.6                              |
| Liver              | 265                | 10               | 1                                                    | 3.7             | 10                      | 39                               | 1.3                              |
| Kidney             | 534 <sup>‡</sup>   | 2                | 1                                                    | 0.4             | 0.8                     | 2                                | 0.5                              |

NOTE. PCP = *Pneumocystis carinii* pneumonia.

\* Per 1,000 person transplant–years.

<sup>†</sup> Includes five heart-lung transplant recipients.

<sup>‡</sup> Includes 16 kidney-pancreas transplant recipients.

logically proven PCP in patients without AIDS at our institution during the 9-year study period (figure 1). The mean interval from the date of transplantation to the diagnosis of PCP was 20 weeks (range, 6 weeks to 16 years). Fifty-four percent (15) of 28 solid organ transplant recipients developed PCP within 6 months of transplantation; 36%,  $\geq$ 1 year after transplantation; and 21%,  $\geq$ 2 years after transplantation.

No patient developed PCP while receiving prophylaxis. Eight solid organ transplant recipients (29%) had received primary PCP prophylaxis (all with TMP-SMZ) for a mean duration of 49 weeks (range, 6 to 312 months). The reasons for discontinuation of TMP-SMZ prophylaxis included elevated creatinine level (1 patient), protocol (5), and unknown (2). The mean interval from the discontinuation of primary prophylaxis to the development of PCP was 34 weeks (range, 8 to 168 weeks).

#### Incidence Rates of PCP During the First Year After Transplantation and Beyond

The overall incidence rate of PCP among 1,299 solid organ recipients was 4.8 cases per 1,000 PTY. The incidence rate of PCP during the first year following transplantation was approximately eight times higher than the rate in the subsequent years (14.5 cases per 1,000 PTY vs. 1.9 cases per 1,000 PTY, respectively) (table 1). Overall organ-specific incidence rates ranged from a high of 22 cases per 1,000 PTY for lung transplant recipients to 0.8 case per 1,000 PTY for kidney transplant recipients. Notably, the incidence rate of PCP beyond 1 year when compared with the first year following transplantation declined significantly for all groups except lung transplant recipients (table 1).

#### Patient Characteristics

Selected clinical features of the 28 solid organ transplant recipients are listed in table 2. Ninety-two percent of patients

were admitted to the hospital with a presumed infectious process, and a pneumonic process was initially suspected in 60%. The mean duration of symptoms before the diagnosis of PCP was 14 days, and the mean interval from admission to the diagnosis was 5.1 days. The diagnosis was made by BAL for 86% (24) of the patients; transbronchial biopsies, 7% (2); and open-lung biopsies, 7% (2).

The most prevalent concomitant pulmonary infection was that due to cytomegalovirus (CMV), which was isolated from the BAL fluid from 36% (10) of 28 patients. Bacteria or fungi were isolated from BAL fluid from eight other patients, includ-

**Table 2.** Clinical features of 28 solid organ transplant recipients with *Pneumocystis carinii* pneumonia at The Cleveland Clinic Foundation during 1987–1996.

| Feature                                                    | Value*          |
|------------------------------------------------------------|-----------------|
| Male gender                                                | 57              |
| Mean age (y) $\pm$ SD                                      | 46 $\pm$ 13.5   |
| Dyspnea                                                    | 68              |
| Fever                                                      | 64              |
| Rales or rhonchi                                           | 39              |
| Interstitial infiltrates                                   | 36              |
| Normal chest radiograph                                    | 3.5             |
| Mean arterial oxygen tension (mm/Hg) $\pm$ SD              | 65.6 $\pm$ 20.1 |
| Mean arterial oxygen gradient (mm/Hg) $\pm$ SD             | 59.5 $\pm$ 49.5 |
| Mean serum LDH level (U/L)                                 | 296             |
| Mean total lymphocyte count (/mm <sup>3</sup> ) $\pm$ SD   | 758 $\pm$ 65    |
| Mean CD4 lymphocyte count (/mm <sup>3</sup> ) <sup>†</sup> | 281             |
| Mean prednisone dose (mg/d)                                | 19.9            |
| Intensity of prednisone                                    |                 |
| Continuous low dose                                        | 68              |
| Continuous high dose                                       | 29              |
| Acute graft rejection                                      | 36              |
| Chronic graft rejection                                    | 28              |

NOTE. LDH = lactate dehydrogenase.

\* Values are percentage of patients unless specified otherwise.

<sup>†</sup> Only measured for three patients (50/mm<sup>3</sup>, 292 and 501).

**Table 3.** Results of a Cox regression model for association with death due to PCP in solid organ transplant patients at The Cleveland Clinic Foundation during 1987–1996.

| Variable                                            | P value | Parameter estimate | SE     | RR (95% CI)   |
|-----------------------------------------------------|---------|--------------------|--------|---------------|
| LDH level                                           | .06     | 0.0058             | 0.0031 | 1.006         |
| Resting AaPO <sub>2</sub>                           | .14     | 0.0129             | 0.0088 | 1.013         |
| Absolute lymphocyte counts                          | .31     | −0.0013            | 0.0013 | 0.999         |
| Cell count in BAL fluid                             | .10     | −0.0190            | 0.0114 | 0.981         |
| For every increase of 100 U/L in serum<br>LDH level | .06     | 0.5841             | 0.313  | 1.8 (1.3–2.4) |
| For every increase of 200 U/L in serum<br>LDH level | .06     | 1.1682             | 0.626  | 3.2 (1.7–6.0) |

NOTE. AaPO<sub>2</sub> = arterial-alveolar oxygen gradient; BAL = bronchoalveolar lavage; LDH = lactate dehydrogenase; PCP = *Pneumocystis carinii* pneumonia.

ing *Staphylococcus* species (2 patients), viridans streptococci (2), *Candida* species (3), and *Aspergillus* species (1).

#### Patients with PCP >1 Year After Transplantation

The 11 patients developing PCP beyond 12 months after transplantation included 4 kidney transplant recipients, 3 lung transplant recipients, 3 heart transplant recipients, and 1 liver transplant recipient. The median interval from the time of transplantation to PCP was 157 weeks (range, 64 weeks to 16 years). The clinical and laboratory findings for these patients were similar to those for the 17 patients with PCP during the first year following solid organ transplantation. All 11 patients were receiving prednisone therapy at the time of PCP (mean dosage, 18 mg/d); three (27%) were receiving tapering doses, and one (9%) was receiving increasing doses. Sixty-four percent of patients had histological evidence of acute rejection (two patients) or chronic rejection (five patients) at the time of PCP. CMV was isolated from 27% of the BAL fluid cultures. None of these patients had histological evidence of CMV pneumonia.

#### Treatment, Outcome, and Risk Factors for Death

High doses of TMP-SMZ were given to 89% (25) of 28 patients as initial treatment for PCP. The remaining three patients were allergic to TMP-SMZ and were treated with pentamidine parenterally. A change in therapy was made for 10 patients because of drug allergy, drug toxicity, or therapeutic failure, including 32% (eight) of 25 patients receiving TMP-SMZ therapy. Corticosteroid therapy was given to 85% of patients during antipneumocystis treatment. Support with mechanical ventilation was required for 21% of patients because of acute respiratory failure; two of these patients died.

Eight patients (29%) died within 30 days of the episode of PCP, of whom five died of PCP or related complications (including three of the 11 patients who had PCP after the first year of transplantation). Comparing survivors and patients who

died of other causes with those who died of PCP, we found that one risk factor was significantly associated with death: a higher mean serum LDH level at presentation (392 U/L vs. 277 U/L, respectively). A Cox regression model was used to assess the relationship of four continuous variables (serum LDH level, resting AaPO<sub>2</sub>, absolute lymphocyte counts, and cell count in BAL fluid) with survival. The model suggested that increasing serum LDH levels were associated with an increased risk of mortality ( $P = .06$ ) (table 3). There was no relationship between survival and resting AaPO<sub>2</sub>, absolute lymphocyte counts, or cell count in BAL fluid. Those patients with high serum LDH levels were at greater risk of death. For every increase of 100 U/L of serum LDH, the relative risk of death nearly doubled (table 3).

#### Cost-Benefit Analysis of PCP Prophylaxis Beyond the First Year of Transplantation

The mean cost of hospitalization for the 28 cases of PCP was \$25,000 per case (1995 dollars) or \$200,000 for the eight cases in organ transplant recipients between 1987 and 1996 that occurred >1 year after transplantation. The costs of PCP prophylaxis beyond the first year of transplantation for the duration of the 9-year study period for the entire cohort of patients was estimated to be \$121,560 by using the following assumptions: \$30 per year for TMP-SMZ therapy (thrice weekly) [9] and a total of 4,052 cumulative PTY for the 1,171 organ transplant recipients who survived the first year of transplantation. Therefore, TMP-SMZ prophylaxis would be cost-effective from an economic perspective if it prevents all cases of PCP.

#### Discussion

The most important conclusions of our study are that the incidence of PCP among solid organ transplant recipients is highest during the first year following transplantation and that no patient developed PCP while receiving primary prophylaxis. Rates of PCP differed between types of transplant recipients.

**Table 4.** Review of cases of PCP in solid organ transplant recipients at risk for this infection.

| Transplant type,<br>location [reference] | Study<br>period | No. of PCP<br>cases/total no.<br>of patients at<br>risk* (%) | No. of deaths<br>due to PCP/total<br>no. of cases (%) | Mean time<br>from<br>transplantation<br>to onset of<br>PCP in w<br>(range) |
|------------------------------------------|-----------------|--------------------------------------------------------------|-------------------------------------------------------|----------------------------------------------------------------------------|
| <b>Heart-lung</b>                        |                 |                                                              |                                                       |                                                                            |
| Pittsburgh [12]                          | 1983–1986       | 14/16 (88)                                                   | 3/14 (2)                                              | 25 (10–72)                                                                 |
| Pittsburgh [13]                          | 1981–1986       | 6/18 (33)                                                    | NS                                                    | 12–76                                                                      |
| Stanford [14]                            | 1981–1990       | 13/49 (26)                                                   | NS                                                    | 17                                                                         |
| Cambridge [15]                           | 1984–1987       | 2/23 (9)                                                     | 1/2 (50)                                              | 20 and 48                                                                  |
| Subtotal                                 |                 | 35/106 (33)                                                  | 4/16 (25)                                             |                                                                            |
| <b>Heart</b>                             |                 |                                                              |                                                       |                                                                            |
| Philadelphia [16]                        | 1989            | 9/140 (6)                                                    | 2/9 (22)                                              | 16                                                                         |
| Stanford [17]                            | 1982–1984       | 2/77 (3)                                                     | NS                                                    | 20 and 102                                                                 |
| Utah [8]                                 | 1988–1989       | 7/17 (41)                                                    | 0/7                                                   | NS                                                                         |
| Italy [18]                               | 1985–1991       | 7/241 (3)                                                    | NS                                                    | 14 (8–48)                                                                  |
| Pittsburgh [13]                          | 1981–1986       | 5/92 (5)                                                     | NS                                                    | NS                                                                         |
| Spain [19]                               | 1988–1994       | 5/138 (3.6)                                                  | 1/5 (20)                                              | 9–17                                                                       |
| South Africa [20]                        | 1970–1981       | 1/40 (2.5)                                                   | 0/1                                                   | 204                                                                        |
| Germany [21]                             | 1983–1986       | 2/150 (1.3)                                                  | 0/2                                                   | 6 and 10                                                                   |
| Subtotal                                 |                 | 38/895 (4.2)                                                 | 3/24 (12.5)                                           |                                                                            |
| <b>Liver</b>                             |                 |                                                              |                                                       |                                                                            |
| Nebraska [22]                            | 1985–1989       | 14/109 (13)                                                  | 3/14 (21)                                             | 24 (2–82)                                                                  |
| Mayo Clinic [23]                         | 1985–1987       | 6/69 (9)                                                     | 1/6 (17)                                              | 8–12                                                                       |
| Pittsburgh [24]                          | 1984–1985       | 11/101 (11)                                                  | 3/11 (27)                                             | 13 (3–20)                                                                  |
| Subtotal                                 |                 | 31/279 (11)                                                  | 7/31 (23)                                             |                                                                            |
| <b>Kidney</b>                            |                 |                                                              |                                                       |                                                                            |
| Pittsburgh [25]                          | 1977–1982       | 20/335 (6)                                                   | NS                                                    | NS                                                                         |
| Puerto Rico [26]                         | 1985–1987       | 13/245 (5)                                                   | 5/11 (45)                                             | NS                                                                         |
| Oslo [27]                                | 1985–1986       | 14/305 (5)                                                   | 7/14 (50)                                             | 12                                                                         |
| France [28]                              | 1989–1990       | 10/42 (24)                                                   | NS                                                    | 12                                                                         |
| Japan [29]                               | 1970–1990       | 23/567 (41)                                                  | 12/23 (52)                                            | 64 (4–192)                                                                 |
| United Kingdom [30]                      | 1985–1986       | 4/39 (10)                                                    | NS                                                    | NS                                                                         |
| Houston [31]                             | 1985–1987       | 9/227 (4)                                                    | NS                                                    | 14 (8–19)                                                                  |
| Houston [32]                             | 1981–1985       | 8/401 (2)                                                    | NS                                                    | 100                                                                        |
| Wisconsin [33]                           | 1984–1985       | 1/66 (1.5)                                                   | 0/1                                                   | 6                                                                          |
| Sweden [34]                              | 1985–1989       | 8/214 (4)                                                    | 4/8 (50)                                              | 12                                                                         |
| The Netherlands <sup>†</sup> [35]        | 1980–1995       | 15/860 <sup>‡</sup> (2)                                      | NS                                                    | 16 (9–59)                                                                  |
| Subtotal                                 |                 | 125/3,301 (3.8)                                              | 28/57 (49)                                            |                                                                            |
| Total                                    |                 | 229/4,581 (4.9)                                              | 42/144 (29)                                           |                                                                            |

NOTE. NS = not stated; PCP = *Pneumocystis carinii* pneumonia.

\* Not receiving prophylaxis.

<sup>†</sup> Includes kidney-pancreas transplants.

<sup>‡</sup> Specifics of prophylaxis not stated.

The highest incidence occurred among lung transplant recipients (22 cases per 1,000 PTY), for whom there was no decline in rates beyond 1 year of transplantation (in contrast to the other groups of solid organ transplant recipients) (table 1).

Differences in attack rates of PCP between categories of solid organ transplant recipients have been suggested by previous studies of solid organ transplant recipients not receiving PCP prophylaxis (table 4). The crude attack rate of primary PCP among 4,581 at-risk (no prophylaxis) solid organ transplant recipients was 4.9% (229 cases); most of these 229 cases occurred within 6 months of transplantation, although some

cases occurred after the first year of transplantation [12, 13, 17, 20, 22, 29, 32, 35]. The organ-specific attack rates of PCP ranged from a low of ~4% among heart transplant recipients [8, 13, 16–21] and renal transplant recipients [25–35] to 11% among liver transplant recipients [22–24] and 33% among heart-lung transplant recipients [15–17, 35]. None of these studies measured incidence rates as was done in our study, but there were two randomized prospective studies of primary prophylaxis with TMP-SMZ vs. no prophylaxis for 58 heart transplant recipients [8] and 132 renal transplant recipients [33]. It is interesting that the study of heart transplant recipients

was prematurely terminated because of the high attack rate of PCP among the control group (41% vs. 0 among patients receiving prophylaxis), whereas only one case of PCP occurred in the renal transplant patients (1.5% vs. 0 among patients receiving TMP-SMZ prophylaxis).

The attributable mortality rate of 18% that we observed is slightly lower than the rate of 29% that was reported in prior studies (table 4). The association we observed between serum LDH level and prognosis of PCP in solid organ transplant recipients has been previously described in studies of PCP in patients with AIDS [36].

There were limitations to our study that should be highlighted. Our case definition for PCP was very restrictive, and it is possible that additional cases of PCP occurred that were not histologically proven. Although incidence rates of PCP for each transplant category could be measured, we could not measure incidence rates by PTY without prophylaxis because the protocols for primary prophylaxis for PCP were not standardized during the entire study period. The small number of patients with PCP >1 year after transplantation also limited the power to identify specific risk factors associated with late-onset PCP.

Although reactivation of latent infection has been considered the primary explanation for PCP in immunosuppressed patients, studies have demonstrated genetic variation in PCR-amplified *P. carinii* DNA from lung tissue specimens from patients with multiple episodes of PCP [37]. Unlike HIV-infected patients with CD4 cell counts of <200/ $\mu$ L or those with <14% CD4 cells who define individuals at risk [9], the risk of PCP in immunocompromised patients without AIDS, including solid organ transplant recipients, cannot be accurately quantified at present. Primary prophylaxis for PCP is strongly recommended as the standard of care for all solid organ transplant recipients, at least for 6 months after transplantation [10, 38]. Notably, most cases of PCP in our study occurred within 6 months of transplantation in patients who did not receive prophylaxis and would be considered errors of omission by current standards. TMP-SMZ is ideal prophylaxis for nonallergic organ transplant recipients because of the following: its activity against opportunistic pathogens such as *P. carinii*, *Nocardia* species, *Toxoplasma gondii*, and *Listeria monocytogenes*; its activity against the common bacteria causing infections in these patients [33]; its minimal toxicity; and its low cost (the wholesale cost of 160 mg of TMP and 800 mg of SMZ orally three times per week is \$30 per year) [39].

Extending PCP prophylaxis beyond 1 year after transplantation for all solid organ transplant recipients has not been recommended [38]. The cost-benefit analysis of long-term prophylaxis with TMP-SMZ for solid organ transplant patients should not only take into account economic issues but should also include the effect of prophylaxis on colonization and infection by antibiotic-resistant bacteria and fungi [40–42]; the toxicity of TMP-SMZ on hematologic, hepatic, and renal function; and interactions between TMP-SMZ and cyclosporine or tacrolimus (FK-506) [43, 44].

A preemptive strategy of targeting indefinite PCP prophylaxis to the 5%–10% of transplant recipients with recurrent or chronic rejection has been suggested [38]. The primary risk for PCP (and other opportunistic infections) in solid organ transplant recipients is the “net state of immunosuppression,” to which a number of factors contribute, including the total amount of previous and current immunosuppressive treatments, the presence of acute and chronic graft rejection, and the presence of concomitant infections (especially those due to CMV) [10, 35, 45, 46]. Notably, 67% of our patients with PCP after the first year of transplantation had acute or chronic rejection at the time of PCP. We advocate targeting PCP prophylaxis beyond 1 year of transplantation to those patients with recurrent or chronic rejection, and we favor indefinite prophylaxis for lung transplant recipients.

## References

1. Fishman JA. Pneumocystis carinii and parasitic infection in transplantation. *Infect Dis Clin North Am* **1995**;9:1005–44.
2. Sepkowitz KA, Brown AE, Armstrong D. Pneumocystis carinii pneumonia without acquired immunodeficiency syndrome. *Arch Intern Med* **1995**;155:1125–8.
3. Yale SH, Limper AH. *Pneumocystis carinii* pneumonia in patients without acquired immunodeficiency syndrome: associated illnesses and prior corticosteroid therapy. *Mayo Clin Proc* **1996**;71:5–13.
4. Walzer PD, Perl DP, Krogstad DJ, et al. Pneumocystis carinii pneumonia in the United States. *Ann Intern Med* **1974**;80:83–93.
5. Arend SM, Kroon FP, Van't Wout JW. *Pneumocystis carinii* pneumonia in patients without AIDS, 1980 through 1993. *Arch Intern Med* **1995**;155:2436–41.
6. Peters SG, Prakash UBS. Pneumocystis carinii pneumonia. *Am J Med* **1987**;82:73–8.
7. Sepkowitz KA, Brown ARE, Telzak EE, et al. Pneumocystis carinii pneumonia among patients without AIDS at a cancer hospital. *JAMA* **1992**;267:832–7.
8. Olsen SL, Renlund DG, O'Connell JB, et al. Prevention of Pneumocystis carinii pneumonia in cardiac transplant recipients by trimethoprim-sulfamethoxazole. *Transplantation* **1993**;56:359–62.
9. Centers for Disease Control and Prevention. 1997 USPHS/IDSA guidelines for the prevention of opportunistic infections in persons infected with human immunodeficiency virus. *MMWR Morb Mortal Wkly Rep* **1997**;46(RR-12):4–7.
10. Rubin RH. Infection in the organ transplant recipient. In: Rubin R, Young L, eds. *Clinical approach to infection in the compromised host*. 3rd ed. New York: Plenum Medical Book Company, **1994**.
11. Dean A. Epi-info software, version 6.02. Atlanta: Centers for Disease Control and Prevention, **1994**.
12. Gryzan S, Paradis IL, Zeev A, et al. Unexpectedly high incidence of Pneumocystis carinii infection after lung-heart transplantation. *Am Rev Respir Dis* **1988**;137:1268–74.
13. Dummer JS, Montero CG, Griffith BP, et al. Infections in heart-lung transplant recipients. *Transplantation* **1986**;41:725–9.
14. Kramer M, Stoehr C, Lewiston NJ, et al. Trimethoprim-sulfamethoxazole prophylaxis for Pneumocystis carinii infections in heart-lung and lung transplantation—how effective and for how long? *Transplantation* **1992**;53:586–9.
15. Penketh ARL, Higenbottam TW, Hutter J, et al. Clinical experience in the management of pulmonary opportunist infection and rejection in recipients of heart-lung transplants. *Thorax* **1988**;43:762–9.

16. Narrins B, Jessup M. Pneumocystis carinii pneumonia after heart transplantation: a growing problem [abstract no 51]. *J Heart Lung Transplant* **1990**;9:67.
17. Hofflin JM, Potasman I, Baldwin JC, et al. Infectious complications in heart transplant recipients receiving cyclosporine and corticosteroids. *Ann Intern Med* **1987**;106:209–16.
18. Grossi P, Ippoliti GB, Coggi C, et al. Pneumocystis carinii pneumonia in heart transplant recipients. *Infection* **1993**;21:75–9.
19. Munoz P, Rosa M, Paloma J, et al. Pneumocystis carinii infection in heart transplant recipients. *Medicine (Baltimore)* **1997**;76:415–22.
20. Cooper DKC, Lanza RP, Oliver S, et al. Infectious complications after heart transplantation. *Thorax* **1983**;38:822–8.
21. Schafers HJ, Cremer J, Wahlers T, et al. Pneumocystis carinii pneumonia following heart transplantation. *Eur J Cardiothorac Surg* **1987**;1:49–52.
22. Colombo JL, Sammut PH, Langas AN, Shaw BW. The spectrum of Pneumocystis carinii infection after liver transplantation in children. *Transplantation* **1992**;54:621–4.
23. Paya CV, Hermans PE, Washington JA, Smith T, Anhalt JP, Krom RA. Incidence, distribution, and outcome of episodes of infection in 100 orthotopic liver transplantations. *Mayo Clin Proc* **1989**;64:555–64.
24. Kusne S, Dummer JS, Singh N, et al. Infections after liver transplantation: an analysis of 101 consecutive cases. *Medicine (Baltimore)* **1988**;67:132–43.
25. Hardy AM, Wajszcuk CP, Suffrendini AF, Hakala TR, Ho M. *Pneumocystis carinii* pneumonia in renal-transplant recipients treated with cyclosporine and steroids. *J Infect Dis* **1984**;149:143–7.
26. Santiago-Dephin EA, Mora E, Gonzalez AZ, Morales-Otero LA, Bermudez R. Factors in an outbreak of Pneumocystis carinii in a transplant unit. *Transplant Proc* **1988**;20:462–5.
27. Talseth T, Holdaas H, Albrechtsen D, et al. Increasing incidence of Pneumocystis carinii pneumonia in renal transplant patients. *Transplant Proc* **1988**;20:400–1.
28. Bourbigot B, Bensoussan T, Garo B, et al. CD4 T-lymphocytes as predictors of pneumonia after kidney transplantation. *Transplant Proc* **1993**;25:1491–2.
29. Sugimoto H, Uchida H, Akiyama T, et al. Improved survival of renal allograft recipients with Pneumocystis carinii pneumonia by early diagnosis and treatment. *Transplant Proc* **1992**;24:1556–8.
30. Higgins RM, Bloom SL, Hopkin JM, Morris PJ. The risks and benefits of low-dose cotrimoxazole prophylaxis for Pneumocystis pneumonia in renal transplantation. *Transplantation* **1989**;47:558–60.
31. Johnson PC, Lewis RM, Van Buren CT, Kahan BD. Pneumocystis carinii pneumonia in renal transplant recipients [letter]. *Arch Surg* **1988**;123:912–3.
32. Jarwenko M, Pifer L, Kerman R, et al. Serologic methods for the early diagnosis of Pneumocystis carinii infection in renal allograft recipients. *Transplantation* **1986**;41:436–42.
33. Fox BC, Sollinger HW, Belzer FO, Maki DG. A prospective, randomized, double-blind study of trimethoprim-sulfamethoxazole for prophylaxis of infection in renal transplantation: clinical efficacy, absorption of trimethoprim-sulfamethoxazole, effects on the micro flora, and the cost-benefit of prophylaxis. *Am J Med* **1990**;89:255–74.
34. Ellinder C-G, Andersson J, Bolinder G, Tyden G. Effectiveness of low-dose cotrimoxazole prophylaxis against Pneumocystis carinii pneumonia after renal and/or pancreas transplantation. *Transplant Int* **1992**;5:81–4.
35. Arend SM, Westendorp RGJ, Kroon FP, et al. Rejection treatment and cytomegalovirus infection as risk factors for *Pneumocystis carinii* pneumonia in renal transplant recipients. *Clin Infect Dis* **1996**;22:920–5.
36. Zaman MK, White DA. Serum lactate dehydrogenase levels and Pneumocystis carinii pneumonia. *Am Rev Respir Dis* **1988**;137:796–800.
37. Keely SP, Stringer JR, Baughman RP, et al. Genetic variation among *Pneumocystis carinii hominis* in recurrent pneumocystosis. *J Infect Dis* **1995**;172:595–8.
38. Fishman JA, Rubin RH. Infection in organ-transplant recipients. *N Engl J Med* **1998**;338:1741–51.
39. Feder HM, Milch LR. Viral load and combination therapy for human immunodeficiency virus [letter]. *N Engl J Med* **1997**;336:959–60.
40. Wells CL, Podzorski RP, Peterson PK, et al. Incidence of trimethoprim-sulfamethoxazole-resistant Enterobacteriaceae among transplant recipients. *J Infect Dis* **1984**;150:699–706.
41. Murray BE, Rensimer ER, Dupont HL. Emergence of high level trimethoprim resistance in fecal Escherichia coli during oral administration of trimethoprim or trimethoprim-sulfamethoxazole. *N Engl J Med* **1982**;306:130–5.
42. Tolkoff-Rubin NE, Cosimi AB, Russell PS, Rubin RH. A controlled study of trimethoprim-sulfamethoxazole prophylaxis of urinary tract infections in renal transplant recipients. *Rev Infect Dis* **1982**;4:614–8.
43. Thompson JF, Chalmers DHK, Hunnissett AGW, Wood RFM, Morris PJ. Nephrotoxicity of trimethoprim and cotrimoxazole in renal allograft recipients treated with cyclosporine. *Transplantation* **1983**;36:203–6.
44. Maki DG, Fox BC, Kuntz J, Sollinger HW, Belzer FO. A prospective randomized, double-blind study of trimethoprim-sulfamethoxazole for prophylaxis of infection in renal transplantation. Side effects of trimethoprim-sulfamethoxazole, interaction with cyclosporine. *J Lab Clin Med* **1992**;119:11–24.
45. Rubin RH. Impact of cytomegalovirus infection on organ transplant recipients. *Rev Infect Dis* **1990**;12:S754–67.
46. Hibberd PL, Rubin RH. Clinical aspects of fungal infection in organ transplant recipients. *Clin Infect Dis* **1994**;19(suppl 1):S33–40.
